# Supplementary material
Source: PubMed Central journal article supplement (PMC8526400)
Supplement: NIHMS1739885-supplement-1.pdf [file NIHMS1739885-supplement-1.pdf]

## Supplementary Tables

**Table S1.** NMR spectral data of hygromycin A in DMSO-*d*<sub>6</sub>. Related to Figure 1.

|                      | $\delta_c$ | $\delta_{H^a}$ multi (J in Hz) |
|----------------------|------------|--------------------------------|
| C-1                  | 69.4       | 3.70, m                        |
| C-2                  | 49.2       | 4.31 (ddd, 9.0, 6.0, 3.0)      |
| C-3                  | 69.4       | 3.57 (dd, 7.1, 3.8)            |
| C-4                  | 76.5       | 4.09 (dd, 6.4, 3.9)            |
| C-5                  | 77.1       | 4.02 (m)                       |
| C-6                  | 69.9       | 4.02 (m)                       |
| -OCH <sub>2</sub> O- | 94.1       | 5.13 (s), 4.69 (s)             |
| 1-OH                 |            | 5.02 (d, 5.7)                  |
| 2-NH                 |            | 7.25 (d, 9.1)                  |
| 3-OH                 |            | 5.11 (d, 4.3)                  |
| 6-OH                 |            | 5.06 (d, 5.8)                  |
| C-1'                 | 169.0      |                                |
| C-2'                 | 131.2      |                                |
| C-3'                 | 132.1      | 7.14 (s)                       |
| C-4'                 | 130.7      |                                |
| C-5'                 | 116.6      | 6.88 (d, 2.1)                  |
| C-6'                 | 146.5      |                                |
| C-7'                 | 144.0      |                                |
| C-8'                 | 115.7      | 7.15 (d, 8.5)                  |
| C-9'                 | 121.0      | 6.85 (dd, 8.5, 2.1)            |
| 2'-CH <sub>3</sub>   | 14.5       | 2.03 (d, 1.3)                  |
| C-1''                | 101.3      | 5.65 (d, 4.2)                  |
| C-2''                | 77.0       | 4.02 (m)                       |
| C-3''                | 76.0       | 4.19 (m)                       |
| C-4''                | 87.2       | 4.19 (m)                       |
| C-5''                | 207.6      |                                |
| 5''-CH <sub>3</sub>  | 25.9       | 2.02 (s)                       |
| 3''-OH               |            | 5.86 (m)                       |

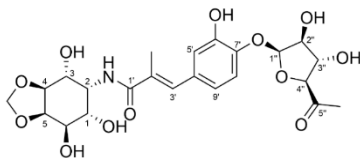

**Table S2.** Comparison of <sup>13</sup>C NMR chemical shifts for hygromycin A (CD<sub>3</sub>OD) isolated in this study with that in the literature (Yoshida et al., 1985). Related to Figure 1.

| This study | Yoshida et al., 1985 | Chemical shift difference |
|------------|----------------------|---------------------------|
| 210.1      | 210.1                | 0                         |
| 172.7      | 172.6                | 0.1                       |
| 148.4      | 148.4                | 0                         |
| 146.1      | 146.0                | 0.1                       |
| 135.1      | 135.0                | 0.1                       |
| 133.0      | 132.2                | 0.8                       |
| 132.4      | 132.2                | 0.2                       |
| 122.7      | 122.4                | 0.3                       |
| 118.5      | 117.8                | 0.7                       |
| 117.9      | 117.8                | 0.1                       |
| 103.8      | 103.7                | 0.1                       |
| 96.3       | 96.2                 | 0.1                       |
| 88.6       | 88.5                 | 0.1                       |
| 78.7       | 78.6                 | 0.1                       |
| 78.3       | 78.2                 | 0.1                       |
| 78.3       | 78.2                 | 0.1                       |
| 77.7       | 75.9                 | 1.8                       |
| 72.7       | 72.6                 | 0.1                       |
| 71.7       | 71.6                 | 0.1                       |
| 71.4       | 71.3                 | 0.1                       |
| 50.4       | 50.7                 | -0.3                      |
| 26.3       | 26.2                 | 0.1                       |
| 14.7       | 14.6                 | 0.1                       |

**Table S3.** MIC of *E. coli* wild-type and mutant strains. Related to Table 1.

| <i>E. coli</i> strain | Description               | HygA (μg/ml) |
|-----------------------|---------------------------|--------------|
| WT                    | BW25113                   | 512          |
| ΔtolC                 | no efflux                 | 16           |
| WT-Pore               | hyperporinated            | 512          |
| ΔtolC-Pore            | no efflux, hyperporinated | 16           |

**Table S4.** Polymorphisms found in *B. turcica* KLEx1 as compared to its parental strain. All deletions and insertions are single-base. Related to Figure 3.

| Locus Tag           | Description                      | Polymorphism Type | Protein Effect |
|---------------------|----------------------------------|-------------------|----------------|
| DB313_RS00990       | RelA/SpoT Family CDS             | SNP               | Substitution   |
| DB313_RS02155 (23S) | 23S rRNA gene                    | SNP               | N/A            |
| DB313_RS03380       | Alpha/beta fold hydrolase        | Deletion          | Frame Shift    |
| DB313_RS04445       | Hypothetical Protein             | SNP               | Substitution   |
| DB313_RS04455       | Hypothetical Protein             | Substitution      | Substitution   |
| DB313_RS04455       | Hypothetical Protein             | SNP               | Substitution   |
| DB313_RS04455       | Hypothetical Protein             | SNP               | Substitution   |
| DB313_RS04480       | DUF871 domain-containing protein | SNP               | Substitution   |
| DB313_RS04480       | DUF871 domain-containing protein | SNP               | Substitution   |

N/A = does not code for a protein (RNA)

**Table S5.** Polymorphisms found in *B. burgdorferi* KLEx2 as compared to its parental strain. All deletions and insertions are single-base. Related to Figure 3.

| Locus Tag  | Description                                                 | Polymorphism Type | Protein Effect |
|------------|-------------------------------------------------------------|-------------------|----------------|
| BB_0059    | CBS domain-containing protein                               | SNP               | Substitution   |
| BB_0067    | peptidase                                                   | SNP               | Substitution   |
| BB_0304    | UDP-N-acetylmuramoyl-tripeptide--D-alanyl-D- alanine ligase | Insertion         | Frame Shift    |
| BB_0336    | hypothetical protein                                        | Deletion          | Frame Shift    |
| BB_0356    | Conserved degenerate gene                                   | Deletion          | *              |
| BB_0357    | Conserved degenerate gene                                   | Insertion         | *              |
| BB_0411    | Conserved degenerate gene                                   | Insertion         | *              |
| BB_0412    | Conserved degenerate gene                                   | Insertion         | *              |
| BB_0413    | Conserved degenerate gene                                   | Insertion         | *              |
| Intergenic | Between BB_0413 and 0414                                    | Deletion          | N/A            |
| BB_r04     | rrlB (23S rRNA)                                             | SNP               | N/A            |
| BB_0511    | Conserved degenerate gene                                   | Deletion          | *              |
| BB_0511    | Conserved degenerate gene                                   | Deletion          | *              |
| BB_0511    | Conserved degenerate gene                                   | Deletion          | *              |
| BB_0511    | Conserved degenerate gene                                   | Deletion          | *              |
| Intergenic | Between BB_0542 and fusA                                    | Deletion          | N/A            |
| BB_0634    | recC                                                        | Deletion          | Frame Shift    |
| BB_0701    | hypothetical protein                                        | Deletion          | Frame Shift    |
| BB_t14     | tRNA-Thr-2                                                  | Deletion          | N/A            |
| BB_t15     | tRNA-Thr-3                                                  | Insertion         | N/A            |
| BB_t17     | tRNA-Leu-4                                                  | Insertion         | N/A            |

N/A = does not code for a protein (RNA or intergenic)

\* = protein is not functional in neither the parental nor mutant strain

**Table S6.** Differentially expressed genes in *B. burgdorferi* hygromycin A resistant mutant KLEx2 in the presence of 4ug/ml hygromycin A, organized by P-value. Related to Figure 3.

| ID         | log2 Fold Change | P-value |
|------------|------------------|---------|
| 16S        | -1.80            | 0.003   |
| bmpD       | -1.67            | 0.005   |
| BB_H41     | -2.37            | 0.005   |
| glpK       | -1.62            | 0.006   |
| BB_0183    | -1.46            | 0.010   |
| BB_J17     | 1.43             | 0.011   |
| BB_0844    | -1.41            | 0.013   |
| BB_J45     | 1.22             | 0.019   |
| BB_J31     | 1.22             | 0.020   |
| BB_0758    | 1.32             | 0.020   |
| BB_J27     | 1.18             | 0.023   |
| BB_A07     | -1.23            | 0.024   |
| BB_U05     | -1.14            | 0.025   |
| BB_0839    | -1.15            | 0.026   |
| tRNA-Cys-1 | -1.17            | 0.028   |
| BB_0212    | -1.15            | 0.030   |
| BBC10      | -8.07            | 0.032   |
| BB_0206    | 1.07             | 0.033   |
| BB_N03     | 1.15             | 0.034   |
| BB_I18     | 1.16             | 0.034   |
| BB_A34     | 1.06             | 0.034   |
| BB_P03     | 1.06             | 0.036   |
| BB_N04     | 1.06             | 0.036   |
| BB_L03     | 1.06             | 0.036   |
| BB_K42     | -1.05            | 0.039   |
| BB_J11     | 1.02             | 0.039   |
| BBC11      | -7.92            | 0.040   |
| BB_O18     | -1.04            | 0.040   |
| BB_B13     | 1.12             | 0.041   |
| BB_0731    | -1.01            | 0.048   |

**Table S7.** Cytotoxicity and therapeutic index of hygromycin A. Each cell line was treated with hygromycin A, and 50% inhibitory concentration was calculated by resazurin (alamar blue/MABA) assay. Related to Figure 4.

| Cell line | IC50 (µg/ml) | Therapeutic index |
|-----------|--------------|-------------------|
| HepG2     | >512         | >2000             |
| FaDu      | >512         | >2000             |
| HEK293    | >512         | >2000             |
